# Supplementary material
Source: Springer Nature journal article supplement (https://www.springermedizin.de/resource/supplementary/12936_2006_331_MOESM8_ESM.pdf/9547566)
Supplement: MOESM8 [file 9547566]

| Site [Article]    | Species                                           | Gempt | Water pits | Wells | Artificial containers | Water surface & rice | Natural containers | Path pools | Rock pools | Other pools | Stream system | Slow running stream | Connected to stream | Drying stream | Ravine and gulliespit | rock bed ravine |
|-------------------|---------------------------------------------------|-------|------------|-------|-----------------------|----------------------|--------------------|------------|------------|-------------|---------------|---------------------|---------------------|---------------|-----------------------|-----------------|
| 1 [94]            | <i>An. elegans</i>                                |       |            |       | ○                     | ○                    | ○                  |            | X          |             | ○             |                     |                     |               |                       |                 |
| 3 [10]            | <i>An. elegans</i>                                |       |            | ○     | ○                     | ○                    | X                  | X          | ○          | X           | X             | X                   | X                   |               |                       |                 |
| 12 [39]           | <i>An. baimaii</i>                                |       |            | ○     | ○                     |                      | ○                  | X          | X          | X           | X             | X                   | X                   | X             | X                     |                 |
| 15 [44]           | <i>An. dirus s.l. ( An. baimaii)</i>              |       |            |       |                       |                      |                    | X          |            | X           |               |                     |                     |               |                       |                 |
| 17 [66]           | <i>An. dirus s.l.( An. baimaii)</i>               |       |            |       |                       |                      |                    | X          |            |             | X             | X                   | X                   | X             |                       |                 |
| 18 [100]          | <i>An. dirus s.l. (An. baimaii)</i>               |       |            |       |                       |                      |                    | X          |            |             |               | X                   |                     |               |                       |                 |
| 44 [41]           | <i>An. dirus s.l.(An. baimaii)</i>                |       |            |       |                       |                      |                    | X          |            |             |               |                     |                     |               |                       |                 |
| 50 [41]           | <i>An. dirus s.l.(An. baimaii)</i>                |       |            |       |                       |                      |                    |            |            |             |               |                     |                     |               |                       |                 |
| 90 [41]           | <i>An. dirus s.l.(An. baimaii)</i>                |       |            |       |                       |                      |                    |            |            |             |               |                     |                     |               |                       | X               |
| 112 [36,57]       | <i>An. baimaii</i>                                |       |            |       |                       |                      | X                  |            | X          |             |               |                     |                     |               |                       |                 |
| 121 [36]          | <i>An. dirus s.l.( An. baimaii)</i>               |       |            |       |                       |                      |                    |            | X          |             |               |                     |                     |               |                       |                 |
| 148[36,45,47,105] | <i>An. baimaii (An. dirus s.s. to be checked)</i> |       |            | X     |                       |                      |                    |            |            |             |               |                     |                     |               |                       |                 |
| 151 [46]          | <i>An. dirus s.l.( An. baimaii)</i>               |       |            | X     | ○                     |                      | ○                  | ○          |            |             | ○             | ○                   | ○                   |               |                       |                 |
| 204[5]            | <i>An. dirus s.s.</i>                             |       |            |       |                       |                      | X                  | X          |            |             | X             | X                   | X                   | X             |                       |                 |
| 204[5]            | <i>An. baimaii</i>                                |       |            |       |                       |                      |                    | X          |            |             | X             | X                   | X                   | X             |                       |                 |
| 204[5]            | <i>An. baimaii - An. dirus s.s.</i>               |       |            |       |                       |                      |                    | X          |            |             | X             | X                   | X                   | X             |                       |                 |
| 235 [43]          | <i>An. dirus s.l.( An. dirus s.s.)</i>            |       | X          |       |                       |                      |                    | X          | X          |             | X             |                     | X                   | X             |                       |                 |
| 241[34,68]        | <i>An. dirus s.s. (An. baimaii to be checked)</i> |       | X          | X     | X                     |                      |                    |            |            | X           |               |                     |                     | X             |                       |                 |
| 243 [42]          | <i>An. dirus s.l.</i>                             | X     |            | X     |                       |                      |                    |            |            |             |               |                     |                     |               |                       |                 |
| 250, 252 [38]     | <i>An. dirus s.l.(An. dirus s.s.)</i>             |       |            |       |                       |                      |                    |            |            |             | X             |                     | X                   |               |                       |                 |
| 302 [89]          | <i>An. dirus s.l. (An. baimaii)</i>               |       |            |       |                       |                      |                    | X          |            | X           |               |                     |                     |               |                       |                 |
| 370 [32]          | <i>An. takasagoensis</i>                          |       |            |       |                       |                      |                    | X          | X          |             |               |                     | X                   | X             |                       | X               |
| 204 [49]          | <i>An. dirus s.l.</i>                             |       |            |       |                       | X                    | X                  |            | X          | X           |               |                     |                     | X             |                       |                 |

Investigated potential larval habitats include: Gem pits, water pits (water pit, turbulence pit ahead of natural drainage gullies), wells (kucha and wells), artificial containers (household pots, reservoir, tank), water surface and rice (fish pond, irrigation channel, marshy area, long marshy areas or luwins, paddy rice fields), natural containers (tree holes, stump from papaya or plantain or bamboo, split bamboo, fallen leaves, axil from arum or banana or plantain), path pools (path puddle, wheel track, tire rut, footprint from human or elephant or buffalo, path natural depression, borrow ditch along a path), rock pools (small rock pool under dense shade), other pools (ground pool in the village, sand pool, reservoir leak, sandy pool, mud pool, furrow on the side of trunks or fallen tree trunk, ground depression) , stream system including slow running stream (only along the bank where meanders slowed down the current, number of larvae increased as current slowed, along forest stream), connected to stream (spring pools, pools connected to stream, stream margins, some pools in sandy banks filled by underground seepage, high ground seepage, small sandy pool in seepage area), drying stream (isolated stream pool, drying pool in seasonal streams, decreases when water stagnated and muddied), rock bed of ravine (rock pool in tree shaded ravine, rock pool along stream under shade, rocky bed of ravine).
